# Supplementary material
Source: HighWire-hosted journal article supplement (https://delf06.com/highwire/filestream/94011/field_highwire_adjunct_files/1/Supplementary_Table1.pdf)
Supplement: Supplementary_Table1.pdf [file Supplementary_Table1.pdf]

| Resequencing Analysis    | Revised Cambridge Reference Sequence RCRS | Case 1        | Case 2        | Case 3        | Case 4        | Case 5        | Case 6        | Case 7        | Case 8        | Case 9        | Case 10       | Case 11       | Case 12       | Case 13       | Case 14       | Case 15       | Case 16       | Case 17       | Case 18       | Case 19       |
|--------------------------|-------------------------------------------|---------------|---------------|---------------|---------------|---------------|---------------|---------------|---------------|---------------|---------------|---------------|---------------|---------------|---------------|---------------|---------------|---------------|---------------|---------------|
| RCRS mtDNA base position | Reference sequence                        | M240_01_rehyb | M240_02_rehyb | M240_03_rehyb | M240_04_rehyb | M240_05_rehyb | M240_06_rehyb | M240_07_rehyb | M240_08_rehyb | M240_09_rehyb | M240_10_rehyb | M240_11_rehyb | M240_12_rehyb | M240_13_rehyb | M240_14_rehyb | M240_15_rehyb | M240_16_rehyb | M240_17_rehyb | M240_18_rehyb | M240_19_rehyb |
| 73 a                     | a                                         | g             | g             | g             | g             | g             | g             | g             | g             | g             | g             | g             | n             | g             | a             | a             | g             | g             | g             | g             |
| 113 c                    | c                                         | c             | c             | c             | c             | c             | c             | c             | c             | c             | c             | c             | c             | c             | c             | t             | c             | c             | c             | c             |
| 143 g                    | g                                         | g             | g             | g             | g             | g             | g             | g             | g             | g             | g             | g             | g             | g             | g             | g             | g             | g             | g             | g             |
| 150 c                    | t                                         | c             | c             | c             | c             | c             | c             | t             | c             | c             | c             | c             | c             | c             | c             | c             | c             | c             | c             | c             |
| 152 t                    | n                                         | t             | t             | t             | t             | t             | c             | t             | n             | t             | t             | t             | t             | t             | t             | t             | c             | t             | t             | t             |
| 153 a                    | a                                         | a             | a             | a             | a             | a             | a             | a             | g             | a             | a             | a             | a             | g             | a             | a             | a             | g             | a             | a             |
| 195 t                    | t                                         | t             | t             | t             | t             | t             | t             | t             | c             | t             | t             | t             | t             | t             | t             | t             | c             | t             | t             | t             |
| 199 t                    | t                                         | t             | t             | t             | c             | t             | t             | t             | t             | t             | t             | t             | t             | t             | t             | t             | t             | n             | t             | n             |
| 225 g                    | g                                         | g             | g             | g             | g             | g             | g             | g             | g             | g             | g             | g             | g             | g             | g             | g             | g             | g             | g             | g             |
| 228 g                    | g                                         | a             | g             | g             | a             | g             | g             | g             | g             | g             | g             | g             | g             | g             | g             | g             | g             | g             | g             | g             |
| 242 c                    | c                                         | t             | t             | c             | c             | c             | c             | c             | c             | c             | c             | c             | c             | c             | c             | c             | c             | c             | t             | c             |
| 263 a                    | g                                         | g             | g             | g             | g             | g             | g             | g             | g             | g             | g             | g             | g             | g             | g             | g             | g             | g             | g             | g             |
| 271 c                    | c                                         | c             | c             | c             | c             | c             | c             | c             | c             | c             | c             | c             | c             | c             | c             | c             | c             | c             | c             | t             |
| 295 c                    | c                                         | t             | t             | t             | c             | c             | c             | c             | c             | c             | t             | c             | c             | c             | c             | c             | c             | c             | t             | t             |
| 462 c                    | n                                         | t             | t             | t             | c             | c             | n             | c             | n             | c             | n             | c             | c             | c             | c             | c             | n             | n             | t             | t             |
| 477 t                    | t                                         | t             | n             | t             | t             | t             | t             | t             | c             | t             | t             | t             | t             | t             | t             | t             | t             | t             | t             | t             |
| 482 t                    | t                                         | t             | t             | c             | t             | t             | t             | t             | t             | t             | t             | t             | t             | t             | t             | t             | t             | t             | t             | t             |
| 489 t                    | t                                         | c             | c             | c             | t             | t             | t             | t             | t             | t             | c             | t             | t             | t             | t             | t             | t             | t             | c             | c             |
| 750 a                    | g                                         | g             | g             | g             | g             | a             | g             | g             | g             | g             | g             | g             | g             | g             | g             | g             | g             | g             | g             | g             |
| 896 a                    | a                                         | a             | a             | a             | a             | a             | a             | a             | a             | a             | a             | a             | a             | a             | a             | a             | a             | a             | a             | a             |
| 953 t                    | t                                         | t             | t             | t             | c             | t             | t             | t             | t             | t             | t             | t             | t             | t             | t             | t             | t             | t             | t             | t             |
| 1438 a                   | g                                         | g             | g             | g             | g             | a             | g             | g             | g             | g             | g             | g             | g             | g             | g             | g             | g             | g             | g             | g             |
| 1555 a                   | g                                         | g             | g             | g             | g             | g             | g             | g             | g             | g             | g             | g             | g             | g             | g             | g             | g             | g             | g             | g             |
| 1719 g                   | g                                         | g             | g             | g             | a             | g             | g             | a             | g             | g             | g             | g             | g             | a             | g             | g             | g             | a             | g             | g             |
| 1721 c                   | c                                         | c             | c             | c             | c             | c             | c             | c             | c             | c             | t             | c             | c             | c             | c             | c             | c             | c             | c             | c             |
| 1811 a                   | a                                         | a             | a             | a             | a             | a             | a             | g             | a             | a             | a             | a             | a             | a             | g             | a             | a             | a             | a             | a             |
| 2158 t                   | t                                         | c             | c             | t             | t             | t             | t             | t             | t             | c             | t             | t             | t             | t             | t             | t             | t             | t             | c             | t             |
| 2294 a                   | a                                         | a             | a             | a             | a             | a             | a             | g             | a             | a             | a             | a             | a             | a             | g             | a             | a             | a             | a             | a             |
| 2706 a                   | g                                         | g             | g             | g             | g             | g             | g             | g             | g             | g             | g             | g             | g             | g             | g             | g             | g             | g             | g             | g             |
| 3010 g                   | a                                         | a             | a             | a             | g             | g             | g             | a             | a             | a             | g             | g             | g             | g             | g             | g             | g             | g             | a             | a             |
| 3197 t                   | t                                         | t             | t             | t             | t             | t             | t             | t             | t             | t             | c             | t             | t             | t             | t             | t             | t             | t             | t             | t             |
| 3394 t                   | t                                         | t             | t             | c             | t             | t             | t             | t             | t             | t             | t             | t             | t             | t             | t             | t             | t             | t             | t             | t             |
| 3796 a                   | g                                         | a             | a             | a             | a             | a             | a             | a             | a             | a             | a             | a             | a             | a             | a             | a             | a             | a             | a             | a             |
| 4048 g                   | g                                         | g             | g             | g             | g             | g             | g             | g             | g             | g             | g             | g             | g             | g             | g             | g             | g             | g             | g             | g             |
| 4216 t                   | t                                         | c             | c             | c             | c             | t             | t             | t             | c             | t             | c             | t             | t             | t             | t             | t             | t             | t             | c             | c             |
| 4703 t                   | t                                         | t             | t             | t             | t             | t             | t             | t             | t             | t             | t             | t             | t             | t             | t             | t             | t             | t             | t             | t             |
| 4732 a                   | a                                         | a             | a             | a             | a             | a             | a             | a             | a             | a             | g             | a             | a             | a             | a             | a             | a             | a             | a             | a             |
| 4769 a                   | g                                         | g             | g             | g             | g             | a             | g             | g             | g             | g             | g             | g             | g             | g             | g             | a             | g             | g             | g             | g             |
| 4959 g                   | g                                         | g             | g             | g             | g             | g             | g             | g             | g             | g             | g             | g             | g             | g             | g             | a             | g             | g             | g             | g             |
| 5460 g                   | c                                         | a             | a             | g             | g             | g             | g             | g             | g             | g             | g             | g             | g             | g             | g             | g             | g             | g             | a             | a             |
| 5465 c                   | c                                         | t             | t             | c             | c             | c             | c             | c             | c             | c             | t             | c             | c             | c             | c             | c             | c             | c             | t             | c             |
| 5773 g                   | g                                         | g             | a             | g             | a             | g             | g             | g             | g             | g             | g             | g             | g             | g             | g             | g             | g             | g             | g             | g             |
| 6221 a                   | t                                         | t             | t             | t             | t             | c             | t             | c             | t             | c             | t             | t             | c             | t             | t             | t             | n             | t             | t             | t             |
| 6371 c                   | c                                         | c             | c             | c             | c             | c             | c             | c             | t             | c             | c             | c             | c             | c             | c             | c             | c             | t             | c             | c             |
| 6518 c                   | c                                         | c             | c             | c             | c             | c             | c             | t             | c             | c             | c             | c             | c             | c             | t             | c             | c             | c             | c             | c             |
| 6716 a                   | a                                         | a             | a             | a             | a             | g             | a             | a             | a             | a             | a             | a             | a             | a             | a             | a             | a             | a             | a             | a             |
| 6776 t                   | t                                         | t             | t             | t             | t             | t             | t             | t             | t             | t             | t             | t             | t             | t             | t             | c             | t             | t             | t             | t             |
| 6911 t                   | t                                         | t             | t             | t             | t             | t             | t             | t             | t             | t             | t             | t             | t             | t             | t             | t             | t             | t             | t             | t             |
| 7010 c                   | c                                         | c             | c             | c             | c             | c             | c             | c             | c             | c             | c             | c             | c             | c             | c             | c             | c             | c             | c             | c             |
| 7028 c                   | c                                         | t             | t             | t             | t             | c             | t             | t             | c             | t             | t             | c             | t             | t             | c             | t             | t             | t             | t             | t             |
| 7184 a                   | a                                         | a             | a             | g             | a             | a             | a             | a             | a             | a             | a             | a             | a             | a             | a             | a             | a             | a             | a             | a             |
| 7747 c                   | c                                         | c             | c             | c             | c             | c             | c             | c             | c             | c             | c             | c             | c             | c             | c             | c             | c             | c             | c             | t             |
| 7768 a                   | a                                         | a             | a             | a             | a             | a             | a             | a             | a             | a             | g             | a             | a             | a             | a             | a             | a             | a             | a             | a             |
| 7775 g                   | g                                         | g             | g             | g             | g             | g             | g             | g             | g             | g             | a             | g             | g             | g             | g             | g             | g             | g             | g             | g             |
| 7820 g                   | g                                         | g             | g             | g             | g             | g             | g             | g             | g             | g             | g             | g             | g             | g             | g             | g             | g             | g             | g             | g             |
| 7844 a                   | a                                         | a             | a             | a             | g             | a             | a             | a             | a             | a             | a             | a             | a             | a             | a             | a             | a             | a             | a             | a             |
| 8269 g                   | g                                         | a             | a             | g             | g             | g             | g             | g             | g             | a             | g             | g             | g             | g             | g             | g             | g             | g             | a             | a             |
| 8462 t                   | t                                         | t             | t             | t             | t             | t             | t             | t             | t             | t             | t             | t             | t             | t             | t             | t             | t             | t             | t             | c             |
| 8485 g                   | g                                         | g             | g             | g             | g             | g             | g             | g             | g             | g             | g             | g             | g             | g             | g             | g             | g             | g             | g             | a             |
| 8557 g                   | g                                         | a             | a             | g             | g             | g             | g             | g             | g             | g             | g             | g             | g             | g             | g             | g             | g             | g             | a             | g             |
| 8705 t                   | t                                         | t             | t             | t             | t             | t             | t             | c             | t             | t             | t             | t             | c             | t             | t             | t             | c             | t             | t             | t             |
| 8706 a                   | a                                         | a             | a             | a             | a             | a             | a             | a             | a             | a             | a             | a             | a             | a             | a             | a             | a             | a             | a             | a             |
| 8848 t                   | t                                         | t             | t             | t             | c             | t             | t             | t             | t             | t             | t             | t             | t             | t             | t             | t             | t             | t             | t             | t             |
| 8860 a                   | g                                         | g             | g             | g             | g             | a             | g             | g             | g             | g             | g             | g             | g             | g             | g             | g             | g             | g             | g             | g             |
| 9266 g                   | g                                         | g             | g             | g             | g             | a             | g             | g             | g             | g             | g             | g             | g             | g             | a             | g             | g             | g             | g             | g             |
| 9548 g                   | g                                         | g             | g             | a             | g             | g             | g             | g             | g             | g             | g             | g             | g             | g             | g             | g             | g             | g             | g             | g             |
| 9554 c                   | g                                         | g             | g             | g             | g             | g             | g             | a             | g             | g             | g             | g             | g             | g             | g             | g             | g             | g             | g             | g             |
| 9863 c                   | c                                         | c             | c             | c             | c             | c             | c             | c             | c             | c             | c             | c             | c             | c             | c             | c             | c             | c             | c             | c             |
| 9947 g                   | g                                         | g             | g             | g             | a             | g             | g             | g             | g             | g             | g             | g             | g             | g             | g             | g             | g             | g             | g             | g             |
| 10143 g                  | a                                         | g             | g             | g             | g             | g             | g             | g             | g             | g             | g             | g             | g             | g             | g             | g             | g             | g             | g             | g             |
| 10238 t                  | t                                         | t             | t             | t             | c             | t             | t             | t             | t             | t             | t             | t             | t             | t             | t             | t             | t             | t             | t             | t             |
| 10365 g                  | g                                         | g             | g             | g             | g             | g             | g             | g             | a             | g             | g             | g             | g             | g             | g             | g             | g             | g             | g             | g             |
| 10398 a                  | a                                         | g             | g             | g             | a             | a             | a             | a             | a             | a             | a             | a             | a             | a             | a             | a             | a             | a             | a             | g             |
| 10410 t                  | t                                         | t             | t             | c             | a             | t             | t             | t             | t             | t             | t             | t             | t             | t             | t             | t             | t             | t             | t             | a             |
| 10463 t                  | t                                         | t             | t             | c             | t             | t             | t             | t             | t             | t             | t             | t             | t             | t             | t             | t             | t             | t             | t             | t             |
| 10506 a                  | a                                         | a             | a             | a             | a             | a             | a             | a             | a             | a             | a             | a             | a             | a             | a             | a             | a             | a             | a             | a             |
| 10801 g                  | g                                         | g             | g             | g             | g             | g             | g             | g             | g             | g             | g             | g             | g             | g             | g             | g             | g             | g             | g             | g             |
| 11251 a                  | a                                         | g             | g             | g             | a             | a             | a             | a             | a             | a             | a             | a             | a             | a             | a             | a             | a             | a             | a             | g             |
| 11467 a                  | a                                         | a             | a             | a             | a             | a             | a             | a             | a             | a             | a             | a             | a             | a             | a             | a             | a             | a             | a             | a             |
| 11719 g                  | g                                         | a             | a             | a             | a             | g             | a             | g             | a             | g             | a             | g             | a             | g             | a             | g             | g             | a             | a             | a             |
| 12007 g                  | g                                         | a             | a             | g             | g             | g             | g             | g             | g             | g             | g             | g             | g             | g             | g             | g             | g             | g             | g             | g             |
| 12307 a                  | a                                         | a             | a             | a             | a             | a             | a             | a             | a             | a             | a             | a             | a             | a             | a             | a             | a             | a             | a             | a             |
| 12308 a                  | a                                         | a             | a             | a             | a             | a             | a             | a             | a             | a             | a             | a             | a             | a             | a             | a             | a             | a             | a             | a             |
| 12372 g                  | g                                         | g             | g             | g             | g             | a             | g             | g             | g             | g             | g             | g             | g             | a             | g             | g             | g             | g             | g             | g             |
| 12397 a                  | a                                         | a             | a             | a             | a             | a             | a             | a             | a             | a             | a             | a             | a             | a             | a             | a             | a             | a             | a             | a             |
| 12501 g                  | g                                         | g             | g             | g             | a             | g             | g             | g             | g             | g             | g             | g             | g             | g             | g             | g             | g             | g             | g             | g             |
| 12505 g                  | g                                         | g             | g             | g             | a             | g             | g             | g             | g             | g             | g             | g             | g             | g             | g             | g             | g             | g             | g             | g             |
| 12512 a                  | g                                         | a             | a             | g             | a             | a             | a             | a             | a             | a             | a             | a             | a             | a             | a             | a             | a             | a             | a             | g             |
| 12627 a                  | a                                         | a             | a             | a             | a             | a             | a             | a             | a             | g             | a             | a             | a             | a             | a             | a             | a             | a             | a             | a             |
| 12705 c                  | c                                         | c             | c             | c             | t             | c             | c             | c             | c             | c             | c             | c             | c             | c             | c             | c             | c             | c             | c             | c             |
| 12864 t                  | t                                         | t             | t             | t             | c             | t             | t             | t             | t             | c             | t             | t             | t             | t             | t             | t             | t             | t             | t             | t             |
| 13002 c                  | c                                         | c             | c             | t             | c             | c             | c             | c             | c             | c             | c             | c             | c             | c             | c             | c             | c             | c             | c             | c             |
| 13203 a                  | a                                         | a             | a             | a             | g             | a             | a             | a             | a             | a             | a             | a             | a             | a             | a             | a             | a             | a             | a             | a             |
| 13708 g                  | g                                         | a             | a             | a             | g             | g             | g             | g             | g             | g             | a             | n             | n             | g             | g             | g             | g             | g             | a             | a             |

|                     |   |   |   |   |   |   |   |   |   |   |   |   |   |   |   |   |   |   |   |
|---------------------|---|---|---|---|---|---|---|---|---|---|---|---|---|---|---|---|---|---|---|
| 13780               | a | a | a | a | g | a | a | a | a | a | a | a | a | a | a | a | a | a | a |
| 13879               | t | c | c | t | t | t | t | t | t | c | t | t | t | t | t | t | t | t | c |
| 13934               | c | c | c | c | c | c | c | c | c | c | c | c | c | c | c | c | c | c | c |
| 13966               | n | a | a | a | a | a | a | g | a | a | a | g | a | a | a | g | a | a | a |
| 14139               | a | a | a | a | a | a | a | g | a | a | a | a | a | a | g | a | a | a | a |
| 14180               | t | t | t | t | t | t | t | t | c | t | t | t | t | t | t | t | t | t | t |
| 14364               | g | g | g | g | g | g | g | g | g | a | a | g | g | g | g | g | g | g | g |
| 14470               | t | t | t | t | t | t | t | c | t | t | t | c | t | t | t | t | c | t | t |
| 14766               | c | t | t | t | t | c | t | t | c | t | c | c | t | t | c | c | t | t | t |
| 14798               | t | t | t | c | t | t | t | t | t | t | t | t | t | t | t | t | t | t | t |
| 15326               | g | g | g | g | g | a | g | g | g | g | g | g | g | g | g | g | g | g | g |
| 15415               | c | c | c | c | c | c | c | c | c | c | c | c | c | c | c | c | c | c | c |
| 15452               | n | a | a | a | c | n | n | c | c | a | c | c | n | n | n | n | n | a | a |
| 15468               | t | c | c | c | c | c | c | c | c | c | c | c | c | c | c | c | c | c | c |
| 15758               | a | a | a | a | a | a | a | a | g | a | a | a | a | a | a | a | a | a | a |
| 16069               | c | t | t | t | c | c | c | c | c | t | c | c | c | c | c | c | c | t | t |
| 16126               | t | c | c | c | t | n | t | t | t | c | t | t | t | t | t | t | t | c | c |
| 16129               | g | g | g | g | g | a | g | g | g | g | g | g | g | g | g | g | g | g | g |
| 16145               | g | a | a | g | g | g | g | g | a | g | g | g | g | g | g | g | g | a | a |
| 16169               | c | n | c | t | c | c | c | c | n | c | c | c | c | c | c | c | c | n | c |
| 16172               | t | c | c | t | c | t | t | t | c | t | t | t | t | t | t | t | t | c | t |
| 16181               | g | a | a | a | a | a | a | a | a | a | a | a | a | a | a | a | a | a | a |
| 16183               | n | a | a | a | a | a | a | c | a | a | a | a | c | a | a | a | n | a | n |
| 16222               | c | n | t | c | c | c | c | c | t | c | c | c | c | c | c | c | c | t | c |
| 16223               | c | c | c | c | t | c | c | c | n | c | c | c | c | c | c | c | c | c | c |
| 16255               | g | g | g | g | g | g | g | a | g | g | g | g | a | g | g | g | a | g | n |
| 16256               | c | c | c | c | c | c | c | n | c | c | n | n | c | c | c | c | n | c | t |
| 16261               | n | t | t | n | n | n | n | n | n | n | n | n | n | n | n | n | n | n | n |
| 16266               | c | n | c | c | c | c | c | n | n | c | n | c | n | c | n | c | n | t | n |
| 16269               | a | a | a | a | g | a | a | a | a | a | a | a | a | a | a | a | n | n | a |
| 16278               | c | c | c | c | c | c | c | t | c | c | c | c | c | c | c | c | t | c | c |
| 16301               | c | c | c | c | t | c | c | c | c | c | c | c | c | c | c | n | c | c | c |
| 16390               | n | g | g | g | g | g | a | g | g | g | g | g | a | g | g | g | g | g | g |
| 16519               | c | t | t | t | t | t | c | c | c | t | n | n | c | c | c | t | c | t | c |
| Haplogroup assigned | H | U | U | U | J | H | J | J | H | U | J | H | J | J | H | J | J | U | U |
